# Supplementary material for: Tolerance of Rodents to an Intravenous Bolus Injection of Sodium Nitrate in a High Concentration
Source: MDPI journal article supplement (doi:10.3390/biology11050794), 2022-05-23
Supplement: s1 [file s1]

## Supplementary information

**Table S1.** Individual animal breath rate before, during, and following a sodium nitrate injection\*, during anesthesia.

| Animal number | Rat/<br>Mouse | Male/<br>Female | Weight (g)** | Breath rate before Injection | Breath rate during Injection | Breath rate following Injection | Sodium Nitrate Dose (mg/kg) |
|---------------|---------------|-----------------|--------------|------------------------------|------------------------------|---------------------------------|-----------------------------|
| 1             | Rat           | M               | 252          | 84                           | 68                           | 64                              | 50.6                        |
| 2             | Rat           | M               | 243          | 84                           | 68                           | 64                              | 52.5                        |
| 3             | Rat           | M               | 245          | 76                           | 52                           | 52                              | 52.0                        |
| 4             | Rat           | F               | 248          | 84                           | 88                           | 52                              | 51.4                        |
| 5             | Rat           | F               | 230          | 76                           | 84                           | 44                              | 55.4                        |
| 6             | Rat           | F               | 240          | 96                           | 60                           | 56                              | 53.1                        |
| 1             | Mouse         | M               | 25           | 84                           | 104                          | 104                             | 51.0                        |
| 2             | Mouse         | M               | 25           | 144                          | 84                           | 72                              | 51.0                        |
| 3             | Mouse         | M               | 25           | 88                           | 96                           | 88                              | 51.0                        |
| 4             | Mouse         | F               | 25           | 148                          | 96                           | 136                             | 51.0                        |
| 5             | Mouse         | F               | 25           | 152                          | 136                          | 80                              | 51.0                        |
| 6             | Mouse         | F               | 25           | 120                          | 152                          | 100                             | 51.0                        |

\* The sodium nitrate solution (150 mM) was injected intravenously as a bolus as described in the Materials and Methods.

\*\* The weight of the mice is reported as per their order. The mice were not weighed individually (inadvertently). Typically, when ordered at this weight, mice weigh  $25 \pm 1$  g.

**Table S2.** Individual animal breath rate before, during, and following a saline injection\*, during anesthesia.

| Animal number | Rat/<br>Mouse | Male/<br>Female | Weight (g)** | Breath rate before Injection | Breath rate during Injection | Breath rate following Injection |
|---------------|---------------|-----------------|--------------|------------------------------|------------------------------|---------------------------------|
| 1             | Rat           | M               | 244          | 80                           | 76                           | 80                              |
| 2             | Rat           | M               | 250          | 94                           | 80                           | 84                              |
| 3             | Rat           | M               | 244          | 88                           | 88                           | 68                              |
| 4             | Rat           | F               | 245          | 44                           | 48                           | 56                              |
| 5             | Rat           | F               | 247          | 60                           | 48                           | 36                              |
| 6             | Rat           | F               | 241          | 52                           | 44                           | 48                              |
| 1             | Mouse         | M               | 23.5         | 148                          | 120                          | 72                              |
| 2             | Mouse         | M               | 25.3         | 128                          | 124                          | 128                             |
| 3             | Mouse         | M               | 23.4         | 80                           | 116                          | 120                             |
| 4             | Mouse         | F               | 20.9         | 148                          | 96                           | 88                              |
| 5             | Mouse         | F               | 21.2         | 80                           | 128                          | 104                             |
| 6             | Mouse         | F               | 22.4         | 124                          | 124                          | 140                             |

\* Medical grade saline was injected intravenously as a bolus as described in the Materials and Methods.
